# Supplementary material for: Comparative Sequence and Structural Analyses of G-Protein-Coupled Receptor Crystal Structures and Implications for Molecular Models
Source: PubMed Central journal article supplement (PMC2738427; doi:10.1371/journal.pone.0007011), 2009-09-16
Supplement: pone.0007011.s008.pdf [file pone.0007011.s008.pdf]

|             | TMH1<br>1.50                                  | ICL1 | TMH2<br>2.50                                  |
|-------------|-----------------------------------------------|------|-----------------------------------------------|
| hAA2AR_3EML | -----IMGSSVYITVELAIAVLAAILGNVLVAVWL--NSNLQ    |      | NVTNYFVVSALAAADIAVGVLAIP-FAITI                |
| tB1AR_2VT4  | -----QWEAGMSLLMALVLLIVAGNVLVIAAIGS--TQRLQ     |      | TLTNLFITSLACADLVVGLLVVP-FGATL                 |
| hB2AR_2RH1  | -----DEVVVVGMGIVMSLIVLAIVFGNVLVITAIK--FERLQ   |      | TVTNYFITSLACADLVVGLVAVVP-FGAAH                |
| sRHO_2Z73   | -----ETWYNPISIVVHPHWRFEFQVDPDAVYVSLGIFIGICGII |      | CGGNGIYIYLFK--TKSLQTPANMFIINLAFSDFTFSLVNGFP   |
| brHO_1U19   | MNGTEGPNFYVFPFSNKTGVVRSPEAPQYYLAEPWQFSMLAAYM  |      | FLLIMLGFPINFLTLYVTVQ--HKKLRTPLNYYILLNLAVADLF  |
| hrHO        | MNGTEGPNFYVFPFSNATGVVRSPEYQYYLAEPWQFSMLAAYM   |      | FLLIVLGFIPINFLTLYVTVQ--HKKLRTPLNYYILLNLAVADLF |
| hACM1       | -----MNTSAPPVAVSPNITVLAPGKGPWQVAFIGITTTGLLS   |      | SLATVTGNLLVLISFKV--NTELKTVNNYFLLSLACADLIIGTF  |
| hDRD2       | ---MDPLNLSWYDDDLERQNWSRPFNGSDGKADRPHYNYATLL   |      | TLIAVIVFGNVLVCMVSR--EKALQTTTNYLIVSLAVADLLVAT  |
| hV1AR       | SSPWWPLATGAGNTSREAEALGEGNGPPRDVRNEELAKLEIAV   |      | LAVTFAVAVLGNSSVLLALHR--TPRKTSRMHLFIRHLSLADL   |
| hV2R        | MLMASTTSAVPGHPSLPSLPSNSSQERPLDTRDPLLARAEALALS |      | SIVFVAVALSNGLVLAALARRGRRHGHWAPIHVFIGHLCLADL   |
| hCCR5       | -----MDYQVSSPIYDINYYTSEPCQKINVKIARLLPPLYSLV   |      | FIFGFVGNMLVILILIN--CKRLKSMTDIYLLNLAISDLFF--   |
| hMC4R       | GMHTSLHLWNRSSYRLHSNASESLGKGYSDGGCYEQLFVSP     |      | EVFVTLGVISLLENILVIVAIK--NKNLHSPMYFFICSLAVAD   |
| hCNR1       | EYFNKSLSSFKENEENIQCGENFMDIECFMVLNPSQQLAIAV    |      | LSLTGLTFTVLENLLVLCVILH-SRSLRCRPSYHPIGSLAVAD   |
| hCNR2       | ----MEECWVTEIANGSKDGLDSNPMKDYMILSGPQTAVAVL    |      | CTLLGLLSALENAVLYLILS-SHQLRRKPSYLFIGSLAGADFL   |
| hP2RY1      | AAFLAGPGSSWGNSTVASTAAVSSSFKCALTKTGFQYYLPAV    |      | YILVFIIGFLGNSVAIWMFVF--HMKPWSGISVYMFNLALAD    |
| hP2Y12      | -----MQAVDNLTSAPGNTSLCTRDKITQVLEPLLYTVLVF     |      | VGLITNGLAMRIFQ--IR-SKSNFIIFLKNTVISDLLMILT     |
| hFSHR       | FDMTYTEFDYDLCEVVDVTCSPKPDAFNPCEIMGYNIIIRVLI   |      | WIFISILAITGNIIVLVILT-SQYKL-TVPRFLMCNLAFA      |
| hLHCGR      | SELSGWDYEYGFCL-PKTPRCAPEPDAFNPCEDIMGYDFLRVLI  |      | WILINILAIMGNTVLFVLLT-SRYKL-TVPRFLMCNLSFAD     |
| htSHR       | LQAFDSHYDYTICGDSMEDMVCTPKSDEFNPCEIMGYKFLRIV   |      | VVWFVSLALLGNVFLVLLILT-SHYKL-NVPRFLMCNLAFA     |

|             | ECL1             | TMH3                 | ICL2<br>3.50             | TMH4                  | ECL2<br>4.50               |
|-------------|------------------|----------------------|--------------------------|-----------------------|----------------------------|
| hAA2AR_3EML | ST-G-----FCAA    | CHGCLFIACFVLVLTQSSIF | SLLAIAIDRYIAIRIPLRYNGLV  | TGTRAKGIIAICWVLSFAIGL | -TPMLGWNNCGQ/-----S        |
| tB1AR_2VT4  | VVRG-----TWLWGS  | FLELWTSLDVLCVTASIE   | TLCVIAIDRYLAITSPPFRYQSLM | TRARAKVIICTVWVAISALVS | FPLPIMHWRD---EDPQAL        |
| hB2AR_2RH1  | ILMK-----MWTFGN  | FWCFWTSIDVLCVTASIE   | TLCVIAVDRYFAITSPPFKYQSL  | LTKNKARVILMVVIVSGLTS  | FPLPIQMHWYRA---THQEI       |
| sRHO_2Z73   | CFLK-----KWIFGFA | ACKVYGFIFGIFGMSIMT   | MAMISIDRYNVIGRPMMAASKM   | SHRAFIMIFIWVWLSVLWAI  | -GPIFGWGAY---TLEGLV        |
| brHO_1U19   | SLHG-----YFVFGPT | GCNLEGFATLGGIEIALWS  | LVLAIERVYVVCCKPM-SNFRF   | GENHAIMGVAFWVMALACAA  | -PPLVGWSRY---IPEGMQ        |
| hrHO        | SLHG-----YFVFGPT | GCNLEGFATLGGIEIALWS  | LVLAIERVYVVCCKPM-SNFRF   | GENHAIMGVAFWVMALACAA  | -PPLVGWSRY---IPEGMQ        |
| hACM1       | LLMG-----HWALGTL | ACDLWLALDYVASNASVMN  | LLLSIFDRYFSVTRPLSYRAKRT  | PRRAALMIGLAWLVSFVLWA  | -PAILFWQYL---VGERTV        |
| hDRD2       | EVVG-----EWKFSRI | HCDIFVTLDVMMCTASILN  | LCAISIDRYTAVAMPMLYNTRY   | SKRRVTVMISIVVWLSFTIS  | C-PLLFGLNNA-----           |
| hV1AR       | ITY-----RFRGPD   | WLCRVVKHLQVFGMFASAY  | MLVMTADRYIAVCHPLKTLQQ    | -PARRSRMIAAAWVLSFVLST | -PQYVVFVSMI---EVNNVT       |
| hV2R        | ATD-----RFRGPD   | ALCRVVKHLQVFGMFASAY  | MILAMTLDRHRAICRPMLAYR    | HGSGAHWNRPLVAVAFSLLLS | SL-PQLFIFAQR---NVEGGS      |
| hCCR5       | AAA-----QWDFGNT  | MCQLLTGLYFIFGIFG     | IFFIILLTIDRYLAVVHAVF     | ALKARTVTFGVVTSVITWV   | VAVFASL-PGIIFTRSQ---KEGL-- |
| hMC4R       | TLNSTD           | TDASQ---FTVNIDNVIDSV | ICSSLLASICSLLSIAVD       | RYFTIFYALQYHNIMTVKRV  | GIIISCIWAAC                |
| hCNR1       | VFHR-----KDSRNV  | FLFKLGGVTASFTASVGS   | FLTAIDRYISIHRRPLAYKR     | IVTRPKAVVAFCLMWTIAI   | VIIVLPLLGWNCE-----         |
| hCNR2       | VFHG-----VDSKAV  | FLKIGSVTMTFTASVGS    | LLLTALDRYLCLRYPPSYK      | ALLTRGRALVTGIMWVLS    | SALVSY-LPLMGWTC-----       |
| hP2RY1      | FNKT-----DWIFGD  | AMCKLQRFIFHVNLYGS    | ILFLTCISAHRYSGVVYPL      | KSLGRLKKKNAICISVLV    | WLVVVAIS-PILFYS            |
| hP2Y12      | AKLG-----TGPLRT  | FVCQVTSVIFYFTMYIS    | ISIFLGLITIDRYQKTR        | PFKTSNPKNLLGAKILS     | VVIWAFMFLLSL-PNMILT        |
| hFSHR       | IHTKSQYHN        | YAIWDW-QTGAGCDAAG    | FFTVFASELSVYTLT          | AITLERWHTITHAMQLDCK   | VQLRHAASVMVMGWIF           |
| hLHCGR      | SQTKGQY          | NHAIWDW-QTGSGC       | STAGFFTVFASELSVYTL       | TVITLERWHTITYAIHL     | DQKLRRLRHAILIMLGG          |
| htSHR       | LYTHSEY          | YNHAIWDW-QTGPGC      | NTAGFFTVFASELSVYTL       | TVITLERWYAITFAMRL     | DRKIRLRHACAIMVGG           |

|             | ECL2       | TMH5                                           | ICL3                                             |
|-------------|------------|------------------------------------------------|--------------------------------------------------|
|             |            | 5.50                                           |                                                  |
| hAA2AR_3EML | QCGEGQVACL | FEDV                                           | -----VPMNYMVYFNFFACVLVPLLLMLGVYLRIFLAARRQL/----- |
| tB1AR_2VT4  | KCYQDPGC   | -CDF                                           | -----VTNRAYAIASSIISFYIPLLIMIFVALRVYREAKEQI/----- |
| hB2AR_2RH1  | NCYAEETC   | -CDF                                           | -----FTNQAYAIASSIVSFYVPLVIMVVFVSRVFEAKRQL/-----  |
| sRHO_2Z73   | -----CNC   | SFDYIS                                         | -----RDSTTRSNI                                   |
| brHO_1U19   | -----CSCG  | IDYYTPHEETNESFVIYMFVHFIIPLIVIFFCYGQLVFTVKEAAA  | -----                                            |
| hrHO        | -----CSCG  | IDYYTLKPEVNNESFVIYMFVHFIIPLIIIFFCYGQLVFTVKEAAA | -----                                            |
| hACM1       | -----LAGQ  | CYIQF                                          | -----LSQPIITFGTAMAAFYLPVTVMCTLYWRIYRETE          |
| hDRD2       | -----DQNE  | CI                                             | -----ANPAFVVYSSIVSFYVFPFIVTLLVYIKIYIVLRRRRKR     |
| hV1AR       | -----KARD  | CWATFI                                         | -----QPWGSRAYVTWMTGGIFVAPVVILGTCYGFICYNIWCNVRG   |
| hV2R        | -----GVTDC | WACFA                                          | -----EPWGRRTYVTWIALMVVAPTLGIAACQVLIFREIHASLVP    |
| hCCR5       | -----HYT   | CSSHFPYSQYQF                                   | -----KNFQTLKIVILGLVPLLVLMVICYSGILKTL             |
| hMC4R       | -----DSSAV | IICLITMFF                                      | -----TMLALMASLYVHMLMARLHIKRIAVL                  |
| hCNR1       | -----KLQSV | CSD                                            | -----IFPHIDETYL                                  |
| hCNR2       | -----PRPC  | SE                                             | -----LFPLIPNDYLLSWLLFIAFLFSGIIYTYGHV             |
| hP2RY1      | -----ITCY  | DTT                                            | -----SDEYLRSYFIYSMCTTVAMFCVPLVLLILG              |
| hP2Y12      | -----KKCS  | F                                              | -----LVWHEIVNYICQVIFWINFLIVIVCYTLITKELYSYVR      |
| hFSHR       | -----CLPMD | I                                              | -----DSPLSQLYVMSLLVLNVLAFVVICG                   |
| hLHCGR      | -----CFPMD | V                                              | -----ETTL                                        |
| hTSHR       | -----CLPMD | T                                              | -----ETPLALAYIVFVLT                              |

|             | ICL3          |
|-------------|---------------|
| hAA2AR_3EML | -----RS       |
| tB1AR_2VT4  | -----K        |
| hB2AR_2RH1  | -----KELRKAQA |
| sRHO_2Z73   | -----QQQESAT  |
| brHO_1U19   | -----QQQESAT  |
| hrHO        | -----         |
| hACM1       | CRAPRL        |
| hDRD2       | PVNR          |
| hV1AR       | -----KTASRQ   |
| hV2R        | -----GSPGEGAH |
| hCCR5       | -----PGTGAI   |
| hMC4R       | -----KVQVTRPD |
| hCNR1       | -----DRQVPGMA |
| hCNR2       | -----         |
| hP2RY1      | -----TRGV     |
| hP2Y12      | -----         |
| hFSHR       | -----         |
| hLHCGR      | -----         |
| hTSHR       | -----         |

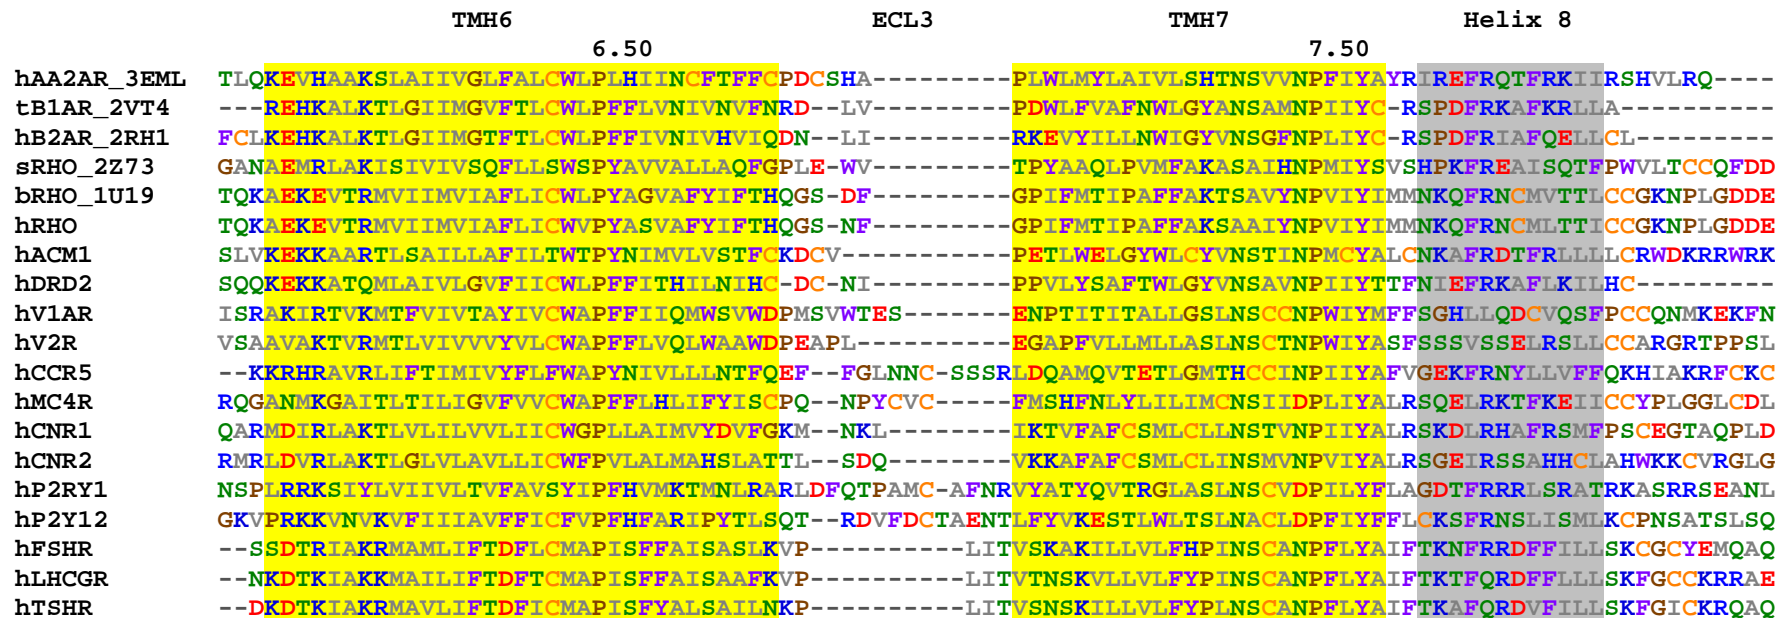

**Figure S1: The multiple sequence alignment of five template and twelve target GPCRs.** Residues are coloured according to type: acidic (red), basic (blue), polar neutral (green), hydrophobic aliphatic (grey), hydrophobic aromatic (purple), special structural properties (brown) and disulphide bond former (orange). The transmembrane helix (TMH) regions used for sequence similarity calculations are shown in yellow, helix eight in grey and the extensions of TMH5 and 6 in turquoise. The Ballesteros-Weinstein nomenclature for each of the highly conserved residues found within each TMH are displayed. The intracellular loops and extracellular loops (ECL) are also indicated.
