# Supplementary material for: Comparative Sequence and Structural Analyses of G-Protein-Coupled Receptor Crystal Structures and Implications for Molecular Models
Source: PubMed Central journal article supplement (PMC2738427; doi:10.1371/journal.pone.0007011), 2009-09-16
Supplement: pone.0007011.s009.pdf [file pone.0007011.s009.pdf]

|        | TMH1         | TMH2             | TMH3         | TMH4        | TMH5             | TMH6              | TMH7        | H8          |
|--------|--------------|------------------|--------------|-------------|------------------|-------------------|-------------|-------------|
| hRHO   | bRHO         | bRHO             | bRHO         | bRHO        | bRHO             | bRHO              | bRHO        | bRHO        |
| hACM1  | hB2AR        | hB2AR            | tB1AR        | hAA2AR      | hB2AR            | hAA2AR tB1AR sRHO | tB1AR hB2AR | hAA2AR      |
| hDRD2  | hB2AR        | tB1AR            | tB1AR        | tB1AR hB2AR | tB1AR hB2AR      | tB1AR             | tB1AR       | tB1AR       |
| hV1AR  | hAA2AR tB1AR | bRHO             | tB1AR        | tB1AR hB2AR | bRHO             | sRHO              | hAA2AR bRHO | sRHO        |
| hV2R   | hB2AR        | hAA2AR sRHO bRHO | hAA2AR sRHO  | sRHO        | bRHO             | sRHO              | hAA2AR      | bRHO        |
| hCCR5  | tB1AR        | hAA2AR tB1AR     | tB1AR        | bRHO        | bRHO             | tB1AR             | hAA2AR      | bRHO        |
| hMC4R  | hAA2AR       | bRHO             | hAA2AR tB1AR | sRHO        | tB1AR hB2AR sRHO | tB1AR hB2AR       | hAA2AR      | hAA2AR      |
| hCNR1  | tB1AR        | hB2AR            | hAA2AR       | tB1AR       | hAA2AR           | hAA2AR tB1AR sRHO | hB2AR       | tB1AR hB2AR |
| hCNR2  | tB1AR        | sRHO             | hAA2AR tB1AR | tB1AR       | hAA2AR hB2AR     | hAA2AR tB1AR      | hB2AR       | tB1AR       |
| hP2RY1 | bRHO         | sRHO             | sRHO         | hB2AR       | hB2AR            | tB1AR             | hB2AR       | sRHO        |
| hP2Y12 | hB2AR sRHO   | hAA2AR tB1AR     | tB1AR        | tB1AR       | bRHO             | tB1AR hB2AR       | hAA2AR      | bRHO        |
| hFSHR  | tB1AR        | hB2AR            | bRHO         | sRHO        | hAA2AR           | sRHO              | sRHO        | tB1AR       |
| hLHCGR | tB1AR        | hB2AR            | bRHO         | sRHO        | hAA2AR bRHO      | sRHO              | sRHO        | tB1AR       |
| hTSHR  | tB1AR        | hB2AR            | bRHO         | sRHO        | bRHO             | hB2AR sRHO        | sRHO        | tB1AR       |

**Figure S2: The highest sequence similarity templates for each of the TMHs and helix 8.** Each of the 14 target GPCRs (excepting hRHO) matches multiple templates across their entire length. In some cases, two or more of the templates are equally similar. These results indicate that sequence similarity alone is not a good indicator of which template to use for homology modeling. The templates are coloured using the following scheme: hAA2AR (purple), tB1AR (blue), hB2AR (green), sRHO (yellow) and bRHO (red).
